# Supplementary material for: Signatures of host specialization and a recent transposable element burst in the dynamic one-speed genome of the fungal barley powdery mildew pathogen
Source: PubMed Central journal article supplement (PMC5964911; doi:10.1186/s12864-018-4750-6), 2018-05-22

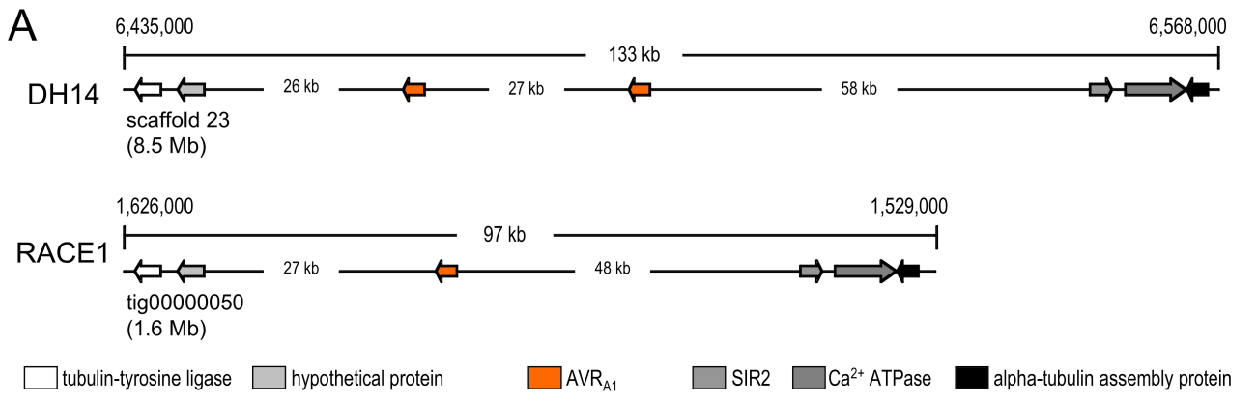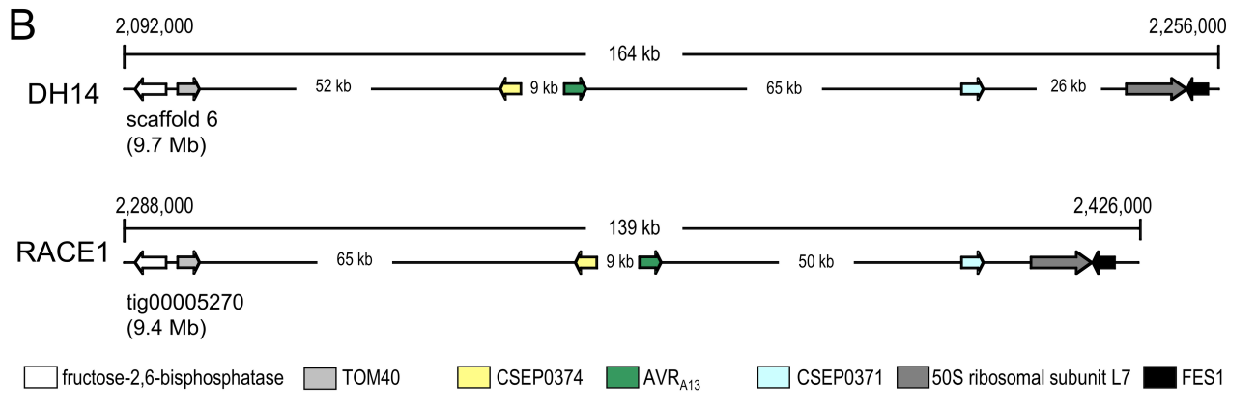

Supplement: 12864_2018_4750_MOESM5_ESM.pdf [file 12864_2018_4750_MOESM5_ESM.pdf]
